# Supplementary material for: Root Canal Disinfection Articles with the Highest Relative Citation Ratios. A Bibliometric Analysis from 1990 to 2019
Source: MDPI journal article supplement (doi:10.3390/antibiotics10111412), 2021-11-18
Supplement: s1 [file s1]

**Table S1.** The top 100 most influential root canal disinfection articles ranked by the highest relative citation rates and top 100 most cited. 1990-2019.

| RCR RANK | N° cites RANK | References                                                                                                                                                                                                                                                                           | RCR   | No. cites |
|----------|---------------|--------------------------------------------------------------------------------------------------------------------------------------------------------------------------------------------------------------------------------------------------------------------------------------|-------|-----------|
| 1        | 1             | Zehnder, M. Root canal irrigants. <i>J Endod.</i> <b>2006</b> , 32, 389-398.                                                                                                                                                                                                         | 40.46 | 774       |
| 2        | 6             | Sjögren, U.; Figdor, D.; Spångberg, L.; Sundqvist, G. The antimicrobial effect of calcium hydroxide as a short-term intracanal dressing. <i>Int Endod J.</i> <b>1991</b> , 24, 119-25.                                                                                               | 32.49 | 360       |
| 3        | 4             | Orstavik, D.; Haapasalo, M. Disinfection by endodontic irrigants and dressings of experimentally infected dentinal tubules. <i>Endod Dent Traumatol.</i> <b>1990</b> , 6, 142-9.                                                                                                     | 30.12 | 393       |
| 4        | 8             | Sjögren, U.; Figdor, D.; Persson, S.; Sundqvist, G. Influence of infection at the time of root filling on the outcome of endodontic treatment of teeth with apical periodontitis. <i>Int Endod J.</i> <b>1997</b> , 30, 297-306.                                                     | 23.38 | 356       |
| 5        | 2             | Stuart, C.H.; Schwartz, S.A.; Beeson, T.J.; Owatz, C.B. Enterococcus faecalis: its role in root canal treatment failure and current concepts in retreatment. <i>J Endod.</i> <b>2006</b> , 32, 93-8.                                                                                 | 18.62 | 440       |
| 6        | 5             | Nair, P.N.; Henry, S.; Cano, V.; Vera, J. Microbial status of apical root canal system of human mandibular first molars with primary apical periodontitis after "one-visit" endodontic treatment. <i>Oral Surg Oral Med Oral Pathol Oral Radiol Endod.</i> <b>2005</b> , 99, 231-52. | 18.61 | 385       |
| 7        | 11            | Gu, L.S.; Kim, J.R.; Ling, J.; Choi, K.K.; Pashley, D.H.; Tay, F.R. Review of contemporary irrigant agitation techniques and devices. <i>J Endod.</i> <b>2009</b> , 35, 791-804.                                                                                                     | 18.05 | 285       |
| 8        | 13            | Ng, Y.L.; Mann, V.; Gulabivala, K. A prospective study of the factors affecting outcomes of non surgical root canal treatment: part 1: periapical health. <i>Int Endod J.</i> <b>2011</b> , 44, 583-609.                                                                             | 17.47 | 256       |
| 9        | 20            | Jeanson MJ, White RR. A comparison of 2.0% chlorhexidine gluconate and 5.25% sodium hypochlorite as antimicrobial endodontic irrigants. <i>J Endod.</i> <b>1994</b> , 20, 276-8.                                                                                                     | 17.46 | 207       |
| 10       | 3             | Banchs, F.; Trope, M. Revascularization of immature permanent teeth with apical periodontitis: new treatment protocol? <i>J Endod.</i> <b>2004</b> , 30, 196-200.                                                                                                                    | 16.76 | 423       |
| 11       | 9             | Siqueira, J.F.; Lopes, H.P. Mechanisms of antimicrobial activity of calcium hydroxide: a critical review. <i>Int Endod J.</i> <b>1999</b> , 32, 361-9.                                                                                                                               | 16.75 | 331       |
| 12       | 49            | Safavi, K.E.; Spangberg, L.S.; Langeland, K. Root canal dentinal tubule disinfection. <i>J Endod.</i> <b>1990</b> , 16, 207-10.                                                                                                                                                      | 16.18 | 152       |
| 13       | 10            | Torabinejad, M.; Khademi, A.A.; Babagoli, J.; Cho, Y.; Johnson, W.B.; Bozhilov, K.; Kim, J.; Shabahang, S. A new solution for the removal of the smear layer. <i>J Endod.</i> <b>2003</b> , 29, 170-5.                                                                               | 15.41 | 289       |
| 14       | 42            | Nerwich, A.; Figdor, D.; Messer, H.H. pH changes in root dentin over a 4-week period following root canal dressing with calcium hydroxide. <i>J Endod.</i> <b>1993</b> , 19, 302-6.                                                                                                  | 15.29 | 159       |
| 15       | 12            | van der Sluis, L.W.; Versluis, M.; Wu, M.K.; Wesselink, P.R. Passive ultrasonic irrigation of the root canal: a review of the literature. <i>Int Endod J.</i> <b>2007</b> , 40, 415-26.                                                                                              | 14.7  | 280       |
| 16       | 7             | Murray, P.E.; Garcia-Godoy, F.; Hargreaves, K.M. Regenerative endodontics: a review of current status and a call for action. <i>J Endod.</i> <b>2007</b> , 33, 377-90.                                                                                                               | 13.95 | 357       |
| 17       | 21            | Ruparel, N.B.; Teixeira, F.B.; Ferraz, C.C.; Diogenes, A. Direct effect of intracanal medicaments on survival of stem cells of the apical papilla. <i>J Endod.</i> <b>2012</b> , 38, 1372-5.                                                                                         | 13.8  | 207       |
| 18       | 15            | Shuping, G.B.; Orstavik, D.; Sigurdsson, A.; Trope, M. Reduction of intracanal bacteria using nickel-titanium rotary instrumentation and various medications. <i>J Endod.</i> <b>2000</b> , 26, 51-5.                                                                                | 13.49 | 245       |
| 19       | 16            | Torabinejad, M.; Handysides, R.; Khademi, A.A.; Bakland, L.K. Clinical implications of the smear layer in Endodontics: a review. <i>Oral Surg Oral Med Oral Pathol Oral Radiol Endod.</i> <b>2002</b> , 94, 658-66.                                                                  | 13.37 | 245       |

|    |    |                                                                                                                                                                                                                                                                                                                 |       |     |
|----|----|-----------------------------------------------------------------------------------------------------------------------------------------------------------------------------------------------------------------------------------------------------------------------------------------------------------------|-------|-----|
| 20 | 27 | Mohammadi, Z.; Dummer, P.M. Properties and applications of calcium hydroxide in endodontics and dental traumatology. <i>Int Endod J.</i> <b>2011</b> , <i>44</i> , 697-730.                                                                                                                                     | 13.17 | 195 |
| 21 | 22 | Violich, D.R.; Chandler, N.P. The smear layer in endodontics - a review. <i>Int Endod J.</i> <b>2010</b> , <i>43</i> , 2-15.                                                                                                                                                                                    | 13.15 | 204 |
| 22 | 14 | Gomes, B.P.; Ferraz, C.C.; Vianna, M.E.; Berber, V.B.; Teixeira, F.B.; Souza-Filho, F.J. In vitro antimicrobial activity of several concentrations of sodium hypochlorite and chlorhexidine gluconate in the elimination of <i>Enterococcus faecalis</i> . <i>Int Endod J.</i> <b>2001</b> , <i>34</i> , 424-8. | 12.72 | 247 |
| 23 | 17 | Bose, R.; Nummikoski, P.; Hargreaves, K. A retrospective evaluation of radiographic outcomes in immature teeth with necrotic root canal systems treated with regenerative endodontic procedures. <i>J Endod.</i> <b>2009</b> , <i>35</i> , 1343-9.                                                              | 12.68 | 235 |
| 24 | 18 | Calt, S.; Serper, A. Time-dependent effects of EDTA on dentin structures. <i>J Endod.</i> <b>2002</b> , <i>28</i> , 17-9.                                                                                                                                                                                       | 12.64 | 232 |
| 25 | 25 | Haapasalo, M.; Shen, Y.; Qian, W.; Gao, Y. Irrigation in endodontics. <i>Dent Clin North Am.</i> <b>2010</b> , <i>54</i> , 291-312.                                                                                                                                                                             | 12.49 | 199 |
| 26 | 73 | Baumgartner, J.C.; Cuenin, P.R. Efficacy of several concentrations of sodium hypochlorite for root canal irrigation. <i>J Endod.</i> <b>1992</b> , <i>18</i> , 605-12.                                                                                                                                          | 12.14 | 131 |
| 27 | 19 | Hülsmann, M.; Heckendorff, M.; Lennon, A. Chelating agents in root canal treatment: mode of action and indications for their use. <i>Int Endod J.</i> <b>2003</b> , <i>36</i> , 810-30.                                                                                                                         | 11.53 | 221 |
| 28 | 60 | Sen, B.H.; Wesselink, P.R.; Türkün, M. The smear layer: a phenomenon in root canal therapy. <i>Int Endod J.</i> <b>1995</b> , <i>28</i> , 141-8.                                                                                                                                                                | 11.32 | 144 |
| 29 | 28 | Hülsmann, M.; Hahn, W. Complications during root canal irrigation-literature review and case reports. <i>Int Endod J.</i> <b>2000</b> , <i>33</i> , 186-93.                                                                                                                                                     | 11.27 | 193 |
| 30 | 43 | White, R.R.; Hays, G.L.; Janer, L.R. Residual antimicrobial activity after canal irrigation with chlorhexidine. <i>J Endod.</i> <b>1997</b> , <i>23</i> , 229-31.                                                                                                                                               | 11.24 | 158 |
| 31 | 29 | Mohammadi, Z.; Abbott, P.V. The properties and applications of chlorhexidine in endodontics. <i>Int Endod J.</i> <b>2009</b> , <i>42</i> , 288-302.                                                                                                                                                             | 11.19 | 185 |
| 32 | 45 | Chen, M.Y.; Chen, K.L.; Chen, C.A.; Tayebaty, F.; Rosenberg, P.A.; Lin, L.M. Responses of immature permanent teeth with infected necrotic pulp tissue and apical periodontitis/abscess to revascularization procedures. <i>Int Endod J.</i> <b>2012</b> , <i>45</i> , 294-305.                                  | 10.87 | 157 |
| 33 | -  | Swimberghe, R.C.D.; Coenye, T.; De Moor, R.J.G.; Meire, M.A. Biofilm model systems for root canal disinfection: a literature review. <i>Int Endod J.</i> <b>2019</b> , <i>52</i> , 604-628.                                                                                                                     | 10.8  | 26  |
| 34 | 39 | Tay, F.R.; Gu, L.S.; Schoeffel, G.J.; Wimmer, C.; Susin, L.; Zhang, K.; Arun, S.N.; Kim, J.; Looney, S.W.; Pashley, D.H. Effect of vapor lock on root canal debridement by using aside-vented needle for positive-pressure irrigant delivery. <i>J Endod.</i> <b>2010</b> , <i>36</i> , 745-50.                 | 10.56 | 165 |
| 35 | 31 | Sim, T.P.; Knowles, J.C.; Ng, Y.L.; Shelton, J.; Gulabivala, K. Effect of sodium hypochlorite on mechanical properties of dentine and tooth surface strain. <i>Int Endod J.</i> <b>2001</b> , <i>34</i> , 120-32.                                                                                               | 10.49 | 181 |
| 36 | 54 | Sen, B.H.; Piskin, B.; Demirci, T. Observation of bacteria and fungi in infected root canals and dentinal tubules by SEM. <i>Endod Dent Traumatol.</i> <b>1995</b> , <i>11</i> , 6-9.                                                                                                                           | 10.49 | 148 |
| 37 | 82 | Martin, D.E.; De Almeida, J.F.; Henry, M.A.; Khaing, Z.Z.; Schmidt, C.E.; Teixeira, F.B.; Diogenes, A. Concentration-dependent effect of sodium hypochlorite on stem cells of apical papilla survival and differentiation. <i>J Endod.</i> <b>2014</b> , <i>40</i> , 51-5.                                      | 10.28 | 123 |
| 38 | 34 | Kim, J.H.; Kim, Y.; Shin, S.J.; Park, J.W.; Jung, I.Y. Tooth discoloration of immature permanent incisor associated with triple antibiotic therapy: a case report. <i>J Endod.</i> <b>2010</b> , <i>36</i> , 1086-91.                                                                                           | 10.21 | 173 |
| 39 | 23 | Haapasalo, H.K.; Sirén, E.K.; Waltimo, T.M.; Ørstavik, D.; Haapasalo, M.P. Inactivation of local root canal medicaments by dentine: an in vitro study. <i>Int Endod J.</i> <b>2000</b> , <i>33</i> , 126-31.                                                                                                    | 10.01 | 203 |
| 40 | -  | Vahdaty, A.; Pitt Ford, T.R.; Wilson, R.F. Efficacy of chlorhexidine in disinfecting dentinal tubules in vitro. <i>Endod Dent Traumatol.</i> <b>1993</b> , <i>9</i> , 243-8.                                                                                                                                    | 9.96  | 99  |

|    |    |                                                                                                                                                                                                                                                                                                        |      |     |
|----|----|--------------------------------------------------------------------------------------------------------------------------------------------------------------------------------------------------------------------------------------------------------------------------------------------------------|------|-----|
| 41 | 24 | Gomes, B.P.; Souza, S.F.; Ferraz, C.C.; Teixeira, F.B.; Zaia, A.A.; Valdrighi, L.; Souza-Filho, F.J. Effectiveness of 2% chlorhexidine gel and calcium hydroxide against <i>Enterococcus faecalis</i> in bovine root dentine in vitro. <i>Int Endod J.</i> <b>2003</b> , <i>36</i> , 267-75.           | 9.96 | 200 |
| 42 | 51 | Hargreaves, K.M.; Diogenes, A.; Teixeira, F.B. Treatment options: biological basis of regenerative endodontic procedures. <i>J Endod.</i> <b>2013</b> , <i>39</i> , S30-43.                                                                                                                            | 9.92 | 149 |
| 43 | -  | Plotino, G.; Grande, N.M.; Mercade, M. Photodynamic therapy in endodontics. <i>Int Endod J.</i> <b>2019</b> , <i>52</i> , 760-774.                                                                                                                                                                     | 9.84 | 22  |
| 44 | 52 | Nosrat, A.; Seifi, A.; Asgary, S. Regenerative endodontic treatment (revascularization) for necrotic immature permanent molars: a review and report of two cases with a new biomaterial. <i>J Endod.</i> <b>2011</b> , <i>37</i> , 562-7.                                                              | 9.83 | 149 |
| 45 | -  | Ohara, P.; Torabinejad, M.; Kettering, J.D. Antibacterial effects of various endodontic irrigants on selected anaerobic bacteria. <i>Endod Dent Traumatol.</i> <b>1993</b> , <i>9</i> , 95-100.                                                                                                        | 9.83 | 98  |
| 46 | -  | Levy, G. Cleaning and shaping the root canal with a Nd:YAG laser beam: a comparative study. <i>J Endod.</i> <b>1992</b> , <i>18</i> , 123-7.                                                                                                                                                           | 9.83 | 85  |
| 47 | 38 | Trevino, E.G.; Patwardhan, A.N.; Henry, M.A.; Perry, G.; Dybdal-Hargreaves, N.; Hargreaves, K.M.; Diogenes, A. Effect of irrigants on the survival of human stem cells of the apical papilla in a platelet-rich plasma scaffold in human root tips. <i>J Endod.</i> <b>2011</b> , <i>37</i> , 1109-15. | 9.82 | 166 |
| 48 | 40 | Sato, I.; Ando-Kurihara, N.; Kota, K.; Iwaku, M.; Hoshino, E. Sterilization of infected root-canal dentine by topical application of a mixture of ciprofloxacin, metronidazole and minocycline in situ. <i>Int Endod J.</i> <b>1996</b> , <i>29</i> , 118-24.                                          | 9.75 | 164 |
| 49 | -  | Căpută, P.E.; Retsas, A.; Kuijk, L.; Chávez de Paz, L.E.; Boutsoukis, C. Ultrasonic irrigant activation during root canal treatment: a systematic review. <i>J Endod.</i> <b>2019</b> , <i>45</i> , 31-44.e13.                                                                                         | 9.52 | 18  |
| 50 | 70 | Trope, M.; Delano, E.O.; Orstavik, D. Endodontic treatment of teeth with apical periodontitis: single vs. multivisit treatment. <i>J Endod.</i> <b>1999</b> , <i>25</i> , 345-50.                                                                                                                      | 9.38 | 132 |
| 51 | 80 | Vera, J.; Siqueira, J.F. Jr.; Ricucci, D.; Loghin, S.; Fernández, N.; Flores, B.; Cruz, A.G. One-versus two-visit endodontic treatment of teeth with apical periodontitis: a histobacteriologic study. <i>J Endod.</i> <b>2012</b> , <i>38</i> , 1040-52.                                              | 9.31 | 124 |
| 52 | 55 | Leonardo, M.R.; Tanomaru Filho, M.; Silva, L.A.; Nelson Filho, P.; Bonifácio, K.C.; Ito, I.Y. In vivo antimicrobial activity of 2% chlorhexidine used as a root canal irrigating solution. <i>J Endod.</i> <b>1999</b> , <i>25</i> , 167-71.                                                           | 9.29 | 148 |
| 53 | -  | Kim, S.G.; Malek, M.; Sigurdsson, A.; Lin, L.M.; Kahler, B. Regenerative endodontics: a comprehensive review. <i>Int Endod J.</i> <b>2018</b> , <i>51</i> , 1367-1388.                                                                                                                                 | 9.28 | 49  |
| 54 | 33 | Ding, R.Y.; Cheung, G.S.; Chen, J.; Yin, X.Z.; Wang, Q.Q.; Zhang, C.F. Pulp revascularization of immature teeth with apical periodontitis: a clinical study. <i>J Endod.</i> <b>2009</b> , <i>35</i> , 745-9.                                                                                          | 9.23 | 176 |
| 55 | 92 | Siqueira, J.F. Jr.; de Uzeda, M. Intracanal medicaments: evaluation of the antibacterial effects of chlorhexidine, metronidazole, and calcium hydroxide associated with three vehicles. <i>J Endod.</i> <b>1997</b> , <i>23</i> , 167-9.                                                               | 9.2  | 118 |
| 56 | 32 | Siqueira, J.F. Jr.; Rôças, I.N.; Favieri, A.; Lima, K.C. Chemomechanical reduction of the bacterial population in the root canal after instrumentation and irrigation with 1%, 2.5%, and 5.25% sodium hypochlorite. <i>J Endod.</i> <b>2000</b> , <i>26</i> , 331-4.                                   | 9.2  | 181 |
| 57 | 76 | Martin, G.; Ricucci, D.; Gibbs, J.L.; Lin, L.M. Histological findings of revascularized/revitalized immature permanent molar with apical periodontitis using platelet-rich plasma. <i>J Endod.</i> <b>2013</b> , <i>39</i> , 138-44.                                                                   | 9.16 | 129 |
| 58 | 36 | Card, S.J.; Sigurdsson, A.; Orstavik, D.; Trope, M. The effectiveness of increased apical enlargement in reducing intracanal bacteria. <i>J Endod.</i> <b>2002</b> , <i>28</i> , 779-83.                                                                                                               | 9.01 | 172 |
| 59 | 66 | Berutti, E.; Marini, R.; Angeretti, A. Penetration ability of different irrigants into dentinal tubules. <i>J Endod.</i> <b>1997</b> , <i>23</i> , 725-7.                                                                                                                                              | 8.99 | 135 |
| 60 | -  | Versiani, M.A.; Leoni, G.B.; Steier, L.; De-Deus, G.; Tassani, S.; Pécora, J.D.; de Sousa-Neto, M.D. Micro-computed tomography study of oval-shaped canals                                                                                                                                             | 8.88 | 105 |

|    |    |                                                                                                                                                                                                                                                                                                                                                |      |     |
|----|----|------------------------------------------------------------------------------------------------------------------------------------------------------------------------------------------------------------------------------------------------------------------------------------------------------------------------------------------------|------|-----|
|    |    | prepared with the self-adjusting file, Reciproc, WaveOne, and ProTaper universal systems. <i>J Endod.</i> <b>2013</b> , 39, 1060-6.                                                                                                                                                                                                            |      |     |
| 61 | -  | Zandi, H.; Petronijevic, N.; Mdala, I.; Kristoffersen, A.K.; Enersen, M.; Rôças, I.N.; Siqueira, J.F. Jr.; Ørstavik, D. Outcome of Endodontic retreatment using 2 root canal irrigants and influence of infection on healing as determined by a molecular method: a randomized clinical trial. <i>J Endod.</i> <b>2019</b> , 45, 1089-1098.e5. | 8.85 | 16  |
| 62 | -  | Haapasalo, M.; Shen, Y.; Wang, Z.; Gao, Y. Irrigation in Endodontics. <i>Br Dent J.</i> <b>2014</b> , 216, 299-303.                                                                                                                                                                                                                            | 8.81 | 94  |
| 63 | -  | Garberoglio, R.; Becce, C. Smear layer removal by root canal irrigants. A comparative scanning electron microscopic study. <i>Oral Surg Oral Med Oral Pathol.</i> <b>1994</b> , 78, 359-67.                                                                                                                                                    | 8.7  | 95  |
| 64 | 26 | Peciuliene, V.; Reynaud, A.H.; Balciuniene, I.; Haapasalo, M. Isolation of yeasts and enteric bacteria in root-filled teeth with chronic apical periodontitis. <i>Int Endod J.</i> <b>2001</b> , 34, 429-34.                                                                                                                                   | 8.68 | 196 |
| 65 | 77 | Siqueira, J.F. Jr.; Batista, M.M.; Fraga, R.C.; de Uzeda, M. Antibacterial effects of endodontic irrigants on black-pigmented gram-negative anaerobes and facultative bacteria. <i>J Endod.</i> <b>1998</b> , 24, 414-6.                                                                                                                       | 8.61 | 129 |
| 66 | 98 | Wu, M.K.; Wesselink, P.R. Efficacy of three techniques in cleaning the apical portion of curved root canals. <i>Oral Surg Oral Med Oral Pathol Oral Radiol Endod.</i> <b>1995</b> , 79, 492-6.                                                                                                                                                 | 8.59 | 113 |
| 67 | -  | Galler, K.M.; Buchalla, W.; Hiller, K.A.; Federlin, M.; Eidt, A.; Schiefersteiner, M.; Schmalz, G. Influence of root canal disinfectants on growth factor release from dentin. <i>J Endod.</i> <b>2015</b> , 41, 363-8.                                                                                                                        | 8.5  | 92  |
| 68 | 37 | Jung, I.Y.; Lee, S.J.; Hargreaves, K.M. Biologically based treatment of immature permanent teeth with pulpal necrosis: a case series. <i>J Endod.</i> <b>2008</b> , 34, 876-87.                                                                                                                                                                | 8.46 | 170 |
| 69 | 83 | Kuruvilla, J.R.; Kamath, M.P. Antimicrobial activity of 2.5% sodium hypochlorite and 0.2% chlorhexidine gluconate separately and combined, as endodontic irrigants. <i>J Endod.</i> <b>1998</b> , 24, 472-6.                                                                                                                                   | 8.37 | 123 |
| 70 | 85 | Safavi, K.E.; Nichols, F.C. Effect of calcium hydroxide on bacterial lipopolysaccharide. <i>J Endod.</i> <b>1993</b> , 19, 76-8.                                                                                                                                                                                                               | 8.32 | 122 |
| 71 | -  | Kontakiotis, E.G.; Filippatos, C.G.; Tzanetakis, G.N.; Agrafioti, A. Regenerative endodontic therapy: a data analysis of clinical protocols. <i>J Endod.</i> <b>2015</b> , 41, 146-54.                                                                                                                                                         | 8.28 | 84  |
| 72 | -  | Peters, L.B.; Wesselink, P.R.; Moorer, W.R. The fate and the role of bacteria left in root dentinal tubules. <i>Int Endod J.</i> <b>1995</b> , 28, 95-9.                                                                                                                                                                                       | 8.28 | 102 |
| 73 | -  | Siqueira, J.F. Jr.; de Uzeda, M. Disinfection by calcium hydroxide pastes of dentinal tubules infected with two obligate and one facultative anaerobic bacteria. <i>J Endod.</i> <b>1996</b> , 22, 674-6.                                                                                                                                      | 8.23 | 103 |
| 74 | -  | Silva, E.J.N.L.; Carvalho, C.R.; Belladonna, F.G.; Prado, M.C.; Lopes, R.T.; De-Deus, G.; Moreira, E.J.L. Micro-CT evaluation of different final irrigation protocols on the removal of hard-tissue debris from isthmus-containing mesial root of mandibular molars. <i>Clin Oral Investig.</i> <b>2019</b> , 23, 681-687.                     | 8.14 | 15  |
| 75 | 94 | Takeda, F.H.; Harashima, T.; Kimura, Y.; Matsumoto, K. A comparative study of the removal of smear layer by three endodontic irrigants and two types of laser. <i>Int Endod J.</i> <b>1999</b> , 32, 32-9.                                                                                                                                     | 8.12 | 117 |
| 76 | 30 | Estrela, C.; Estrela, C.R.; Barbin, E.L.; Spanó, J.C.; Marchesan, M.A.; Pécora, J.D. Mechanism of action of sodium hypochlorite. <i>Braz Dent J.</i> <b>2002</b> , 13, 113-7.                                                                                                                                                                  | 8.11 | 184 |
| 77 | -  | Wigler, R.; Kaufman, A.Y.; Lin, S.; Steinbock, N.; Hazan-Molina, H.; Torneck, C.D. Revascularization: a treatment for permanent teeth with necrotic pulp and incomplete root development. <i>J Endod.</i> <b>2013</b> , 39, 319-26.                                                                                                            | 8.1  | 109 |
| 78 | 74 | Fava, L.R.; Saunders, W.P. Calcium hydroxide pastes: classification and clinical indications. <i>Int Endod J.</i> <b>1999</b> , 32, 257-82.                                                                                                                                                                                                    | 8.07 | 131 |
| 79 | 91 | Desai, P.; Himel, V. Comparative safety of various intracanal irrigation systems. <i>J Endod.</i> <b>2009</b> , 35, 545-9.                                                                                                                                                                                                                     | 7.95 | 119 |

|    |    |                                                                                                                                                                                                                                                                                                                               |      |     |
|----|----|-------------------------------------------------------------------------------------------------------------------------------------------------------------------------------------------------------------------------------------------------------------------------------------------------------------------------------|------|-----|
| 80 | 58 | Reynolds, K.; Johnson, J.D.; Cohenca, N. Pulp revascularization of necrotic bilateral bicuspid using a modified novel technique to eliminate potential coronal discolouration: a case report. <i>Int Endod J.</i> <b>2009</b> , <i>42</i> , 84-92.                                                                            | 7.94 | 145 |
| 81 | 64 | Torabinejad, M.; Cho, Y.; Khademi, A.A.; Bakland, L.K.; Shabahang, S. The effect of various concentrations of sodium hypochlorite on the ability of MTAD to remove the smear layer. <i>J Endod.</i> <b>2003</b> , <i>29</i> , 233-9.                                                                                          | 7.84 | 139 |
| 82 | 86 | Lottanti, S.; Gautschi, H.; Sener, B.; Zehnder, M. Effects of ethylenediaminetetraacetic, etidronic and peracetic acid irrigation on human root dentine and the smear layer. <i>Int Endod J.</i> <b>2009</b> , <i>42</i> , 335-43.                                                                                            | 7.83 | 122 |
| 83 | 79 | Shen, Y.; Stojicic, S.; Haapasalo, M. Antimicrobial efficacy of chlorhexidine against bacteria in biofilms at different stages of development. <i>J Endod.</i> <b>2011</b> , <i>37</i> , 657-61.                                                                                                                              | 7.82 | 126 |
| 84 | -  | Camilleri, J. Color stability of white mineral trioxide aggregate in contact with hypochlorite solution. <i>J Endod.</i> <b>2014</b> , <i>40</i> , 436-40.                                                                                                                                                                    | 7.79 | 77  |
| 85 | 53 | Shah, N.; Logani, A.; Bhaskar, U.; Aggarwal, V. Efficacy of revascularization to induce apexification/apexogenesis in infected, nonvital, immature teeth: a pilot clinical study. <i>J Endod.</i> <b>2008</b> , <i>34</i> , 919-25; Discussion 1157.                                                                          | 7.62 | 149 |
| 86 | 61 | Galler, K.M.; D'Souza, R.N.; Federlin, M.; Cavender, A.C.; Hartgerink, J.D.; Hecker, S.; Schmalz, G. Dentin conditioning codetermines cell fate in regenerative endodontics. <i>J Endod.</i> <b>2011</b> , <i>37</i> , 1536-41.                                                                                               | 7.62 | 141 |
| 87 | 65 | Nielsen, B.A.; Craig Baumgartner, J. Comparison of the EndoVac system to need irrigation of root canals. <i>J Endod.</i> <b>2007</b> , <i>33</i> , 611-5.                                                                                                                                                                     | 7.61 | 137 |
| 88 | 48 | Vianna, M.E.; Gomes, B.P.; Berber, V.B.; Zaia, A.A.; Ferraz, C.C.; de Souza-Filho, F.J. In vitro evaluation of the antimicrobial activity of chlorhexidine and sodium hypochlorite. <i>Oral Surg Oral Med Oral Pathol Oral Radiol Endod.</i> <b>2004</b> , <i>97</i> , 79-84.                                                 | 7.55 | 153 |
| 89 | -  | Chong, B.S.; Pitt Ford, T.R. The role of intracanal medication in root canal treatment. <i>Int Endod J.</i> <b>1992</b> , <i>25</i> , 97-106.                                                                                                                                                                                 | 7.55 | 75  |
| 90 | -  | Stojicic, S.; Shen, Y.; Qian, W.; Johnson, B.; Haapasalo, M. Antibacterial and smear layer removal ability of a novel irrigant, QMiX. <i>Int Endod J.</i> <b>2012</b> , <i>45</i> , 363-71.                                                                                                                                   | 7.47 | 99  |
| 91 | 67 | Gutarts, R.; Nusstein, J.; Reader, A.; Beck, M. In vivo debridement efficacy of ultrasonic irrigation following hand-rotary instrumentation in human mandibular molars. <i>J Endod.</i> <b>2005</b> , <i>31</i> , 166-70.                                                                                                     | 7.43 | 135 |
| 92 | 75 | Mohammadi, Z. Sodium hypochlorite in Endodontics: an update review. <i>Int Dent J.</i> <b>2008</b> , <i>58</i> , 329-41.                                                                                                                                                                                                      | 7.36 | 131 |
| 93 | 81 | Ferraz, C.C.; Gomes, B.P.; Zaia, A.A.; Teixeira, F.B.; Souza-Filho, F.J. In vitro assessment of the antimicrobial action and the mechanical ability of chlorhexidine gel as an endodontic irrigant. <i>J Endod.</i> <b>2001</b> , <i>27</i> , 452-5.                                                                          | 7.35 | 124 |
| 94 | -  | Ma, J.; Wang, Z.; Shen, Y.; Haapasalo, M. A new noninvasive model to study the effectiveness of dentin disinfection by using confocal laser scanning microscopy. <i>J Endod.</i> <b>2011</b> , <i>37</i> , 1380-5.                                                                                                            | 7.35 | 108 |
| 95 | -  | Verma, P.; Nosrat, A.; Kim, J.R.; Price, J.B.; Wang, P.; Bair, E.; Xu, H.H.; Fouad, A.F. Effect of residual bacteria on the outcome of pulp regeneration in vivo. <i>J Dent Res.</i> <b>2017</b> , <i>96</i> , 100-106.                                                                                                       | 7.32 | 51  |
| 96 | 62 | Zehnder, M.; Schmidlin, P.; Sener, B.; Waltimo, T. Chelation in root canal therapy reconsidered. <i>J Endod.</i> <b>2005</b> , <i>31</i> , 817-20.                                                                                                                                                                            | 7.3  | 141 |
| 97 | 35 | Distel, J.W.; Hatton, J.F.; Gillespie, M.J. Biofilm formation in medicated root canals. <i>J Endod.</i> <b>2002</b> , <i>28</i> , 689-93.                                                                                                                                                                                     | 7.27 | 173 |
| 98 | 50 | Thibodeau, B.; Trope, M. Pulp revascularization of a necrotic infected immature permanent tooth: case report and review of the literature. <i>Pediatr Dent.</i> <b>2007</b> , <i>29</i> , 47-50.                                                                                                                              | 7.27 | 151 |
| 99 | -  | De-Deus, G.; Belladonna, F.G.; de Siqueira Zuolo, A.; Perez, R.; Carvalho, M.S.; Souza, E.M.; Lopes, R.T.; Silva, E.J.N.L. Micro-CT comparison of XP-endo Finisher and passive ultrasonic irrigation as final irrigation protocols on the removal of accumulated hard-tissue debris from oval shaped-canals. <i>Clin Oral</i> | 7.24 | 14  |

|     |    |                                                                                                                                                                                                                                                                   |      |     |
|-----|----|-------------------------------------------------------------------------------------------------------------------------------------------------------------------------------------------------------------------------------------------------------------------|------|-----|
|     |    | <i>Investig.</i> <b>2019</b> , 23, 3087-93.                                                                                                                                                                                                                       |      |     |
| 100 | -  | Althumairy, R.I.; Teixeira, F.B.; Diogenes, A. Effect of dentin conditioning with intracanal medicaments on survival of stem cells of apical papilla. <i>J Endod.</i> <b>2014</b> , 40, 521-5.                                                                    | 7.23 | 82  |
| -   | 41 | Thibodeau, B.; Teixeira, F.; Yamauchi, M.; Caplan, D.J.; Trope, M. Pulp revascularization of immature dog teeth with apical periodontitis. <i>J Endod.</i> <b>2007</b> , 33, 680-9.                                                                               | 7.21 | 163 |
| -   | 44 | Wilson, M. Lethal photosensitisation of oral bacteria and its potential application in the photodynamic therapy of oral infections. <i>Photochem Photobiol Sci.</i> <b>2004</b> , 3, 412-8.                                                                       | 6.72 | 158 |
| -   | 46 | Chueh, L.H.; Huang, G.T. Immature teeth with periradicular periodontitis or abscess undergoing apexogenesis: a paradigm shift. <i>J Endod.</i> <b>2006</b> , 32, 1205-13.                                                                                         | 6.73 | 156 |
| -   | 47 | Windley, W. 3rd.; Teixeira, F.; Levin, L.; Sigurdsson, A.; Trope, M. Disinfection of immature teeth with a triple antibiotic paste. <i>J Endod.</i> <b>2005</b> , 31, 439-43.                                                                                     | 7.19 | 155 |
| -   | 56 | Soukos, N.S.; Chen, P.S.; Morris, J.T.; Ruggiero, K.; Abernethy, A.D.; Som, S.; Foschi, F.; Doucette, S.; Bammann, L.L.; Fontana, C.R.; Doukas, A.G.; Stashenko, P.P. Photodynamic therapy for endodontic disinfection. <i>J Endod.</i> <b>2006</b> , 32, 979-84. | 6.89 | 148 |
| -   | 57 | Peciulienė, V.; Balciuniene, I.; Eriksen, H.M.; Haapasalo, M. Isolation of <i>Enterococcus faecalis</i> in previously root-filled canals in a Lithuanian population. <i>J Endod.</i> <b>2000</b> , 26, 593-5.                                                     | 6.46 | 147 |
| -   | 59 | Siqueira, J.F. Jr.; Rôças, I.N.; Favieri, A.; Machado, A.G.; Gahyva, S.M.; Oliveira, J.C.; Abad, E.C. Incidence of postoperative pain after intracanal procedures based on an antimicrobial strategy. <i>J Endod.</i> <b>2002</b> , 28, 457-60.                   | 7.12 | 145 |
| -   | 63 | Athanassiadis, B.; Abbott, P.V.; Walsh, L.J. The use of calcium hydroxide, antibiotics and biocides as antimicrobial medicaments in Endodontics. <i>Aust Dent J.</i> <b>2007</b> , 52(1 Suppl): S64-82.                                                           | 6.73 | 141 |
| -   | 68 | Lee, S.J.; Wu M.K.; Wesselink, P.R. The effectiveness of syringe irrigation and ultrasonics to remove debris from simulated irregularities within prepared root canal walls. <i>Int Endod J.</i> <b>2004</b> , 37, 672-8.                                         | 6.88 | 133 |
| -   | 69 | Naenni, N.; Thoma, K.; Zehnder, M. Soft tissue dissolution capacity of currently used and potential endodontic irrigants. <i>J Endod.</i> <b>2004</b> , 30, 785-7.                                                                                                | 6.76 | 133 |
| -   | 71 | Peters, L.B.; van Winkelhoff, A.J.; Buijs, J.F.; Wesselink, P.R. Effects of instrumentation, irrigation and dressing with calcium hydroxide on infection in pulpless teeth with periapical bone lesions. <i>Int Endod J.</i> <b>2002</b> , 35, 13-21.             | 6.78 | 132 |
| -   | 72 | Dunavant, T.R.; Regan, J.D.; Glickman, G.N.; Solomon, E.S.; Honeyman, A.L. Comparative evaluation of endodontic irrigants against <i>Enterococcus faecalis</i> biofilms. <i>J Endod.</i> <b>2006</b> , 32, 527-31.                                                | 6.31 | 132 |
| -   | 78 | Schoop, U.; Kluger, W.; Moritz, A.; Nedjelik, N.; Georgopoulos, A.; Sperr, W. Bactericidal effect of different laser systems in the deep layers of dentin. <i>Lasers Surg Med.</i> <b>2004</b> , 35, 111-6.                                                       | 6.77 | 128 |
| -   | 84 | Rosenthal, S.; Spångberg, L.; Safavi, K. Chlorhexidine substantivity in root canal dentin. <i>Oral Surg Oral Med Oral Pathol Oral Radiol Endod.</i> <b>2004</b> , 98, 488-92.                                                                                     | 6.24 | 123 |
| -   | 87 | Grigoratos, D.; Knowles, J.; Ng, Y.L.; Gulabivala, K. Effect of exposing dentine to sodium hypochlorite and calcium hydroxide on its flexural strength and elastic modulus. <i>Int Endod J.</i> <b>2001</b> , 34, 113-9.                                          | 6.86 | 122 |
| -   | 88 | Basrani, B.R.; Manek, S.; Sodhi, R.N.; Fillery, E.; Manzur, A. Interaction between sodium hypochlorite and chlorhexidine gluconate. <i>J Endod.</i> <b>2007</b> , 33, 966-9.                                                                                      | 6.78 | 121 |
| -   | 89 | Peters, L.B.; Wesselink, P.R. Periapical healing of endodontically treated teeth in one and two visits obturated in the presence or absence of detectable microorganisms. <i>Int Endod J.</i> <b>2002</b> , 35, 660-7.                                            | 6.56 | 121 |
| -   | 90 | Waltimo, T.; Trope, M.; Haapasalo, M.; Ørstavik, D. Clinical efficacy of treatment procedures in endodontic infection control and one year follow-up of periapical healing. <i>J Endod.</i> <b>2005</b> , 31, 863-6.                                              | 5.63 | 121 |

|                                                                |     |                                                                                                                                                                                                                           |      |     |
|----------------------------------------------------------------|-----|---------------------------------------------------------------------------------------------------------------------------------------------------------------------------------------------------------------------------|------|-----|
| -                                                              | 93  | Chueh, L.H.; Ho, Y.C.; Kuo, T.C.; Lai, W.H.; Chen, Y.H.; Chiang, C.P. Regenerative endodontic treatment for necrotic immature permanent teeth. <i>J Endod.</i> <b>2009</b> , 35, 160-4.                                   | 6.44 | 118 |
| -                                                              | 95  | Estrela, C.; Sydney, G.B.; Bammann, L.L.; Felipe Junior, O. Mechanism of action of calcium and hydroxyl ions of calcium hydroxide on tissue and bacteria. <i>Braz Dent J.</i> <b>1995</b> , 6, 85-90                      | 7.08 | 115 |
| -                                                              | 96  | Teixeira, C.S.; Felipe, M.C.; Felipe, W.T. The effect of application time of EDTA and NaOCl on intracanal smear layer removal: an SEM analysis. <i>Int Endod J.</i> <b>2005</b> , 38, 285-90.                             | 6.2  | 115 |
| -                                                              | 97  | Portenier, I.; Haapasalo, H.; Rye, A.; Waltimo, T.; Ørstavik, D.; Haapasalo, M. Inactivation of root canal medicaments by dentine, hydroxylapatite and bovine serum albumin. <i>Int Endod J.</i> <b>2001</b> , 34, 184-8. | 5.85 | 115 |
| -                                                              | 99  | Sunde, P.T.; Olsen, I.; Debelian, G.J.; Tronstad, L. Microbiota of periapical lesions refractory to endodontic therapy. <i>J Endod.</i> <b>2002</b> , 28, 304-10.                                                         | 5.04 | 112 |
| -                                                              | 100 | Spratt, D.A.; Pratten, J.; Wilson, M.; Gulabivala, K. An in vitro evaluation of the antimicrobial efficacy of irrigants on biofilms of root canal isolates. <i>Int Endod J.</i> <b>2001</b> , 34, 300-7.                  | 5.37 | 111 |
| 76 articles were common to the top 100 RCRs and top 100 cited. |     |                                                                                                                                                                                                                           |      |     |
