# Supplementary material for: Root Canal Disinfection Articles with the Highest Relative Citation Ratios. A Bibliometric Analysis from 1990 to 2019
Source: MDPI journal article supplement (doi:10.3390/antibiotics10111412), 2021-11-18
Supplement: s1 [file s1]

**Table S2.** Keywords with at least three co-occurrences among the top 100 RCR articles in root canal disinfection

| <b>Keywords</b>                 | <b>Co-occurrences</b> | <b>Total link strength</b> |
|---------------------------------|-----------------------|----------------------------|
| root canal irrigants            | 91                    | 887                        |
| sodium hypochlorite             | 52                    | 559                        |
| dental pulp cavity              | 44                    | 473                        |
| dentin                          | 36                    | 347                        |
| root canal preparation          | 36                    | 395                        |
| root canal therapy              | 27                    | 298                        |
| chlorhexidine                   | 26                    | 271                        |
| calcium hydroxide               | 24                    | 258                        |
| periapical periodontitis        | 22                    | 304                        |
| anti-infective agents, local    | 21                    | 213                        |
| drug combinations               | 21                    | 287                        |
| smear layer                     | 21                    | 190                        |
| edetic acid                     | 20                    | 214                        |
| tooth apex                      | 18                    | 298                        |
| dental pulp necrosis            | 16                    | 268                        |
| enterococcus faecalis           | 16                    | 144                        |
| female                          | 16                    | 261                        |
| male                            | 16                    | 267                        |
| anti-bacterial agents           | 13                    | 200                        |
| microscopy, electron, scanning  | 13                    | 120                        |
| root canal filling materials    | 13                    | 234                        |
| dental pulp                     | 12                    | 168                        |
| follow-up studies               | 12                    | 221                        |
| time factors                    | 12                    | 130                        |
| bacteria                        | 11                    | 119                        |
| biofilms                        | 11                    | 113                        |
| child                           | 11                    | 183                        |
| metronidazole                   | 11                    | 181                        |
| therapeutic irrigation          | 11                    | 72                         |
| colony count, microbial         | 10                    | 108                        |
| treatment outcome               | 10                    | 167                        |
| adult                           | 9                     | 131                        |
| analysis of variance            | 9                     | 87                         |
| animals                         | 9                     | 78                         |
| ciprofloxacin                   | 9                     | 151                        |
| disinfectants                   | 9                     | 109                        |
| microbial sensitivity tests     | 9                     | 78                         |
| neovascularization, physiologic | 9                     | 143                        |
| adolescent                      | 8                     | 119                        |
| aluminum compounds              | 8                     | 145                        |
| anti-infective agents           | 8                     | 109                        |
| bacteria, anaerobic             | 8                     | 72                         |
| calcium compounds               | 8                     | 145                        |

|                                  |   |     |
|----------------------------------|---|-----|
| chelating agents                 | 8 | 96  |
| citric acid                      | 8 | 85  |
| minocycline                      | 8 | 139 |
| oxides                           | 8 | 145 |
| silicates                        | 8 | 145 |
| tooth root                       | 8 | 92  |
| apexification                    | 7 | 115 |
| dental disinfectants             | 7 | 70  |
| molar                            | 7 | 88  |
| regeneration                     | 7 | 77  |
| statistics, nonparametric        | 7 | 62  |
| ultrasonics                      | 7 | 44  |
| bicuspid                         | 6 | 83  |
| disinfection                     | 6 | 79  |
| middle aged                      | 6 | 84  |
| periapical tissue                | 6 | 101 |
| tissue scaffolds                 | 6 | 76  |
| bacterial infections             | 5 | 44  |
| chi-square distribution          | 5 | 56  |
| dentin permeability              | 5 | 41  |
| equipment design                 | 5 | 76  |
| incisor                          | 5 | 78  |
| microscopy, confocal             | 5 | 52  |
| odontogenesis                    | 5 | 114 |
| sodium chloride                  | 5 | 56  |
| statistics as topic              | 5 | 73  |
| cattle                           | 4 | 41  |
| cell survival                    | 4 | 56  |
| cells, cultured                  | 4 | 56  |
| dental alloys                    | 4 | 78  |
| detergents                       | 4 | 52  |
| dose-response relationship, drug | 4 | 51  |
| doxycycline                      | 4 | 51  |
| gels                             | 4 | 40  |
| nickel                           | 4 | 78  |
| periapical diseases              | 4 | 56  |
| pharmaceutical vehicles          | 4 | 29  |
| polysorbates                     | 4 | 51  |
| regenerative endodontics         | 4 | 46  |
| retreatment                      | 4 | 46  |
| stem cells                       | 4 | 55  |
| tissue engineering               | 4 | 42  |
| titanium                         | 4 | 78  |
| tooth, nonvital                  | 4 | 43  |
| water                            | 4 | 40  |
| zinc oxide-eugenol cement        | 4 | 68  |

|                                               |   |    |
|-----------------------------------------------|---|----|
| aged                                          | 3 | 56 |
| biocompatible materials                       | 3 | 42 |
| calcium                                       | 3 | 39 |
| dental leakage                                | 3 | 26 |
| dental papilla                                | 3 | 41 |
| gutta-percha                                  | 3 | 64 |
| hydrogen peroxide                             | 3 | 24 |
| image processing, computer-assisted           | 3 | 39 |
| intercellular signaling peptides and proteins | 3 | 27 |
| linear models                                 | 3 | 41 |
| needles                                       | 3 | 18 |
| platelet-rich plasma                          | 3 | 46 |
| potassium iodide                              | 3 | 20 |
| radiography                                   | 3 | 55 |
| solutions                                     | 3 | 28 |
| syringes                                      | 3 | 20 |
| x-ray microtomography                         | 3 | 19 |
